# Supplementary material
Source: PubMed Central journal article supplement (PMC2783412)
Supplement: NIHMS150302-supplement-1.pdf [file NIHMS150302-supplement-1.pdf]

**Supplemental Figure. Chitosan is not toxic to human endothelial cells.** Relative LDH activity measured in the tissue culture supernatant by HUVECs after 2 h co-culture in the absence or presence of various concentrations (0.8, 2, 4, and 8 mg/mL) of chitosan. Bars are the averages of the results for three measurements, and error bars denote standard deviations.
