# Supplementary material
Source: PubMed Central journal article supplement (PMC2783412)

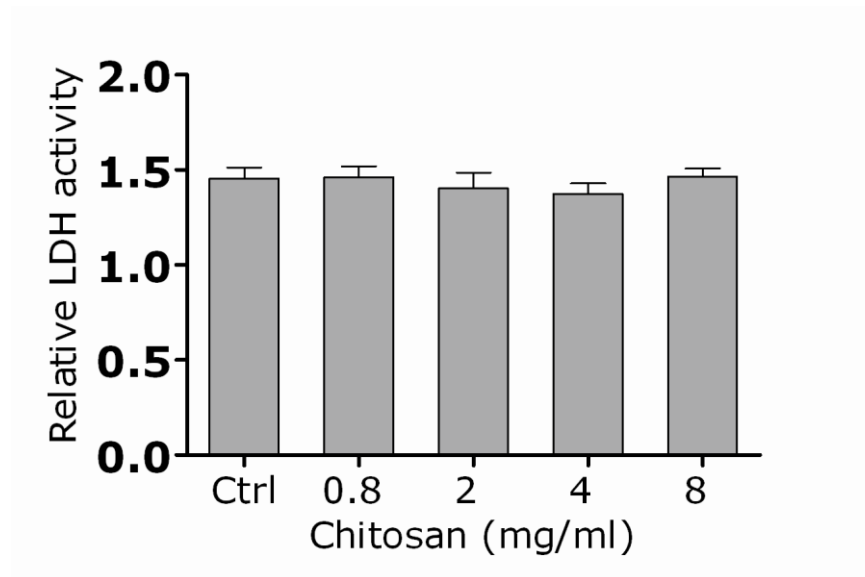

Supplement: NIHMS150302-supplement-01.pdf [file NIHMS150302-supplement-01.pdf]
